# Supplementary material
Source: PubMed Central journal article supplement (PMC2148277)
Supplement: pnas_0707130104_8.pdf [file pnas_0707130104_8.pdf]

## Find a reference compound

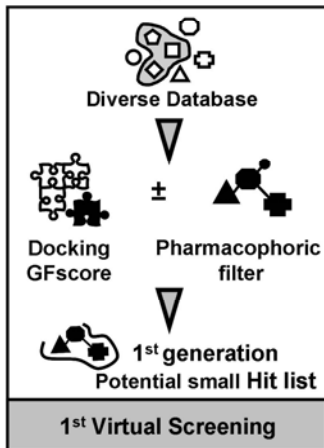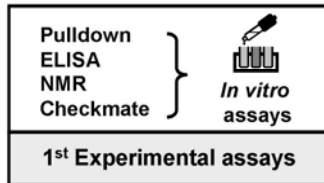

(▲●■)

First active compound

## Predefine a chemical space

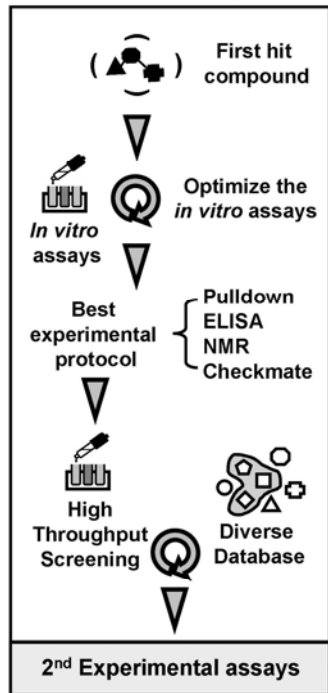

(▲●■)

Primary biological hits

## Explore the chemical space

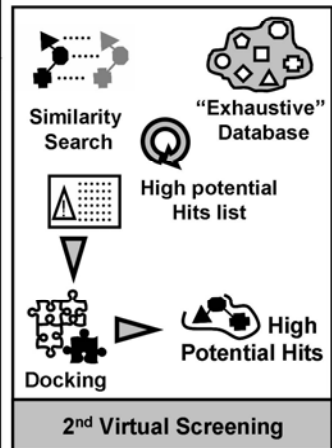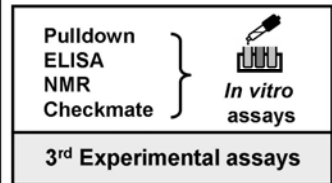

((▲●■))

Secondary biological hits
