# Supplementary material
Source: PubMed Central journal article supplement (PMC2148277)

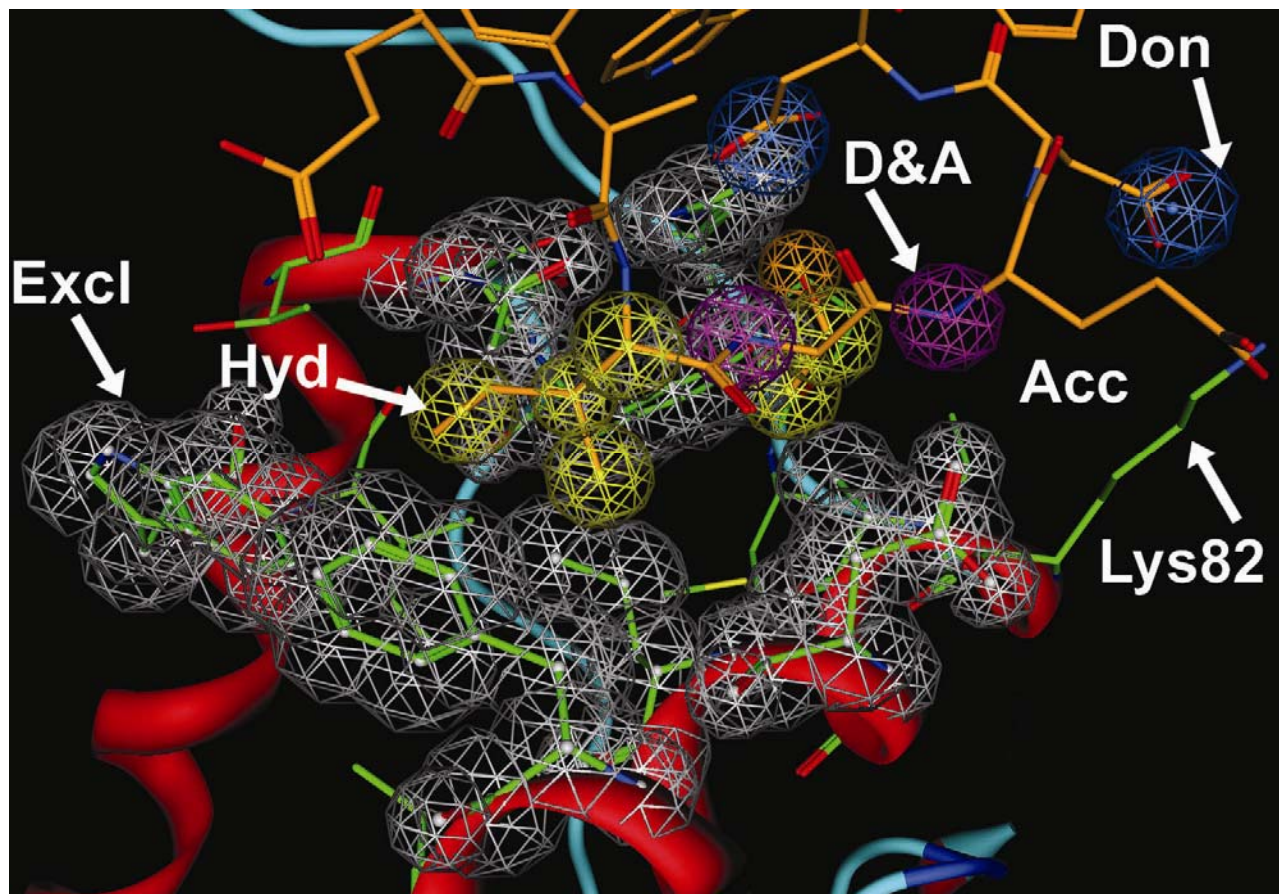

Supplement: pnas_0707130104_1.pdf [file pnas_0707130104_1.pdf]

**a- Log FF / RN luciferase**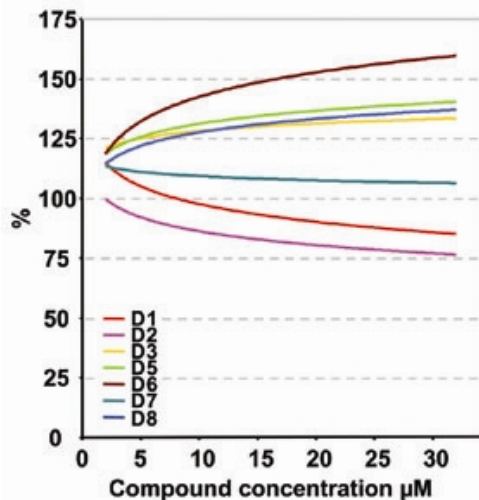**b- FF luciferase**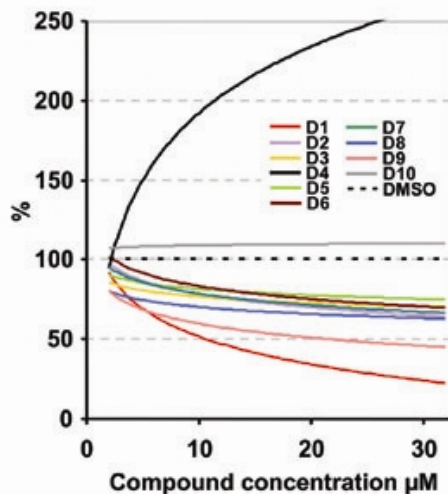**c- RN luciferase**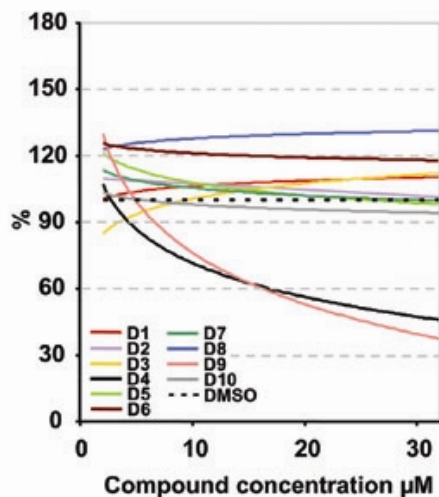**d- Cell toxicity**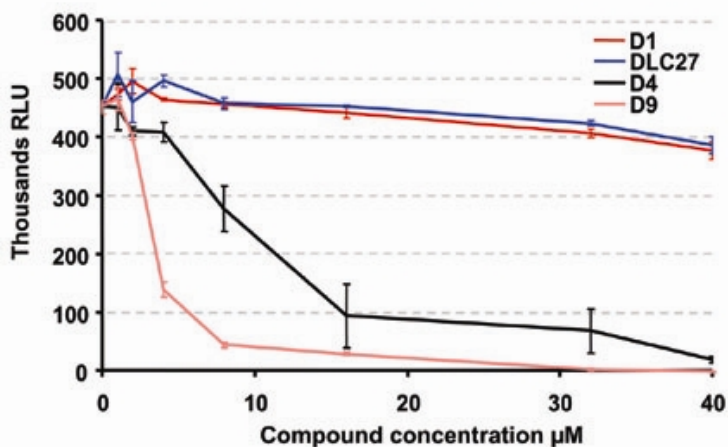

Supplement: pnas_0707130104_2.pdf [file pnas_0707130104_2.pdf]

**A**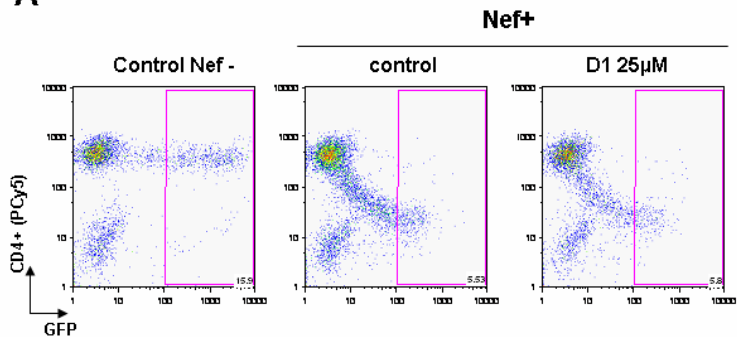**B**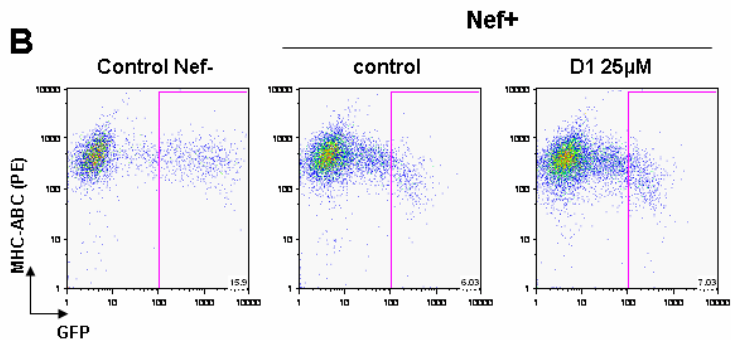**C**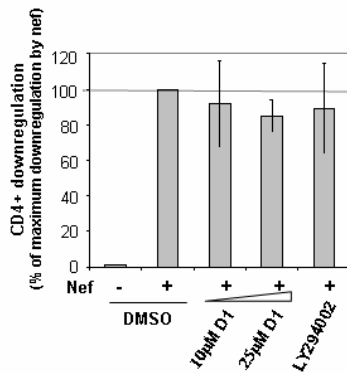**D**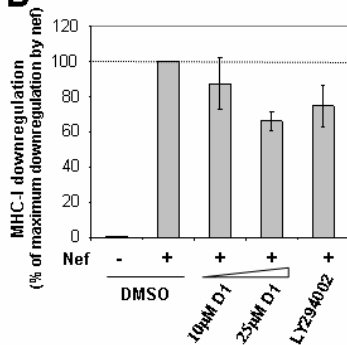

Supplement: pnas_0707130104_3.pdf [file pnas_0707130104_3.pdf]

**a-**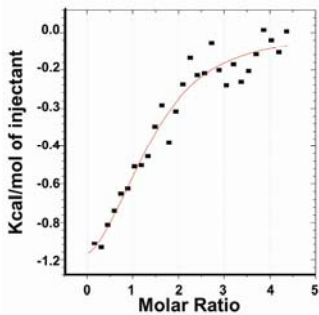**b-**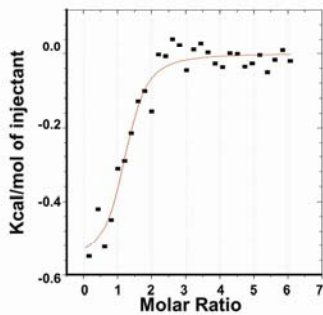**c-**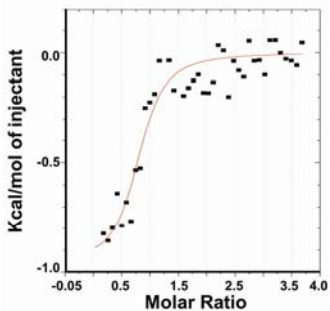**d-**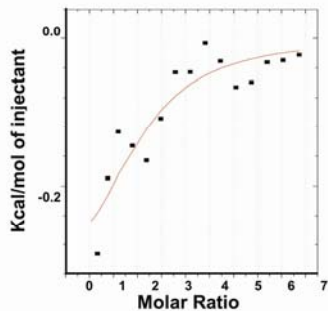**e-**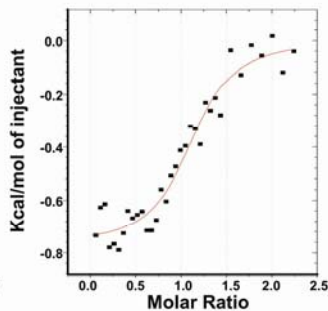

Supplement: pnas_0707130104_4.pdf [file pnas_0707130104_4.pdf]

**a-**

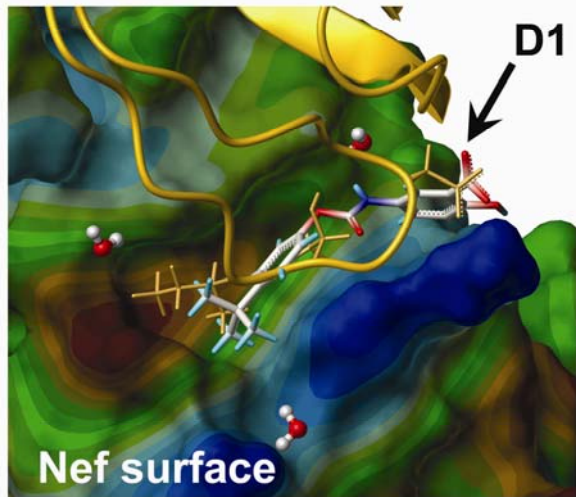

**b-**

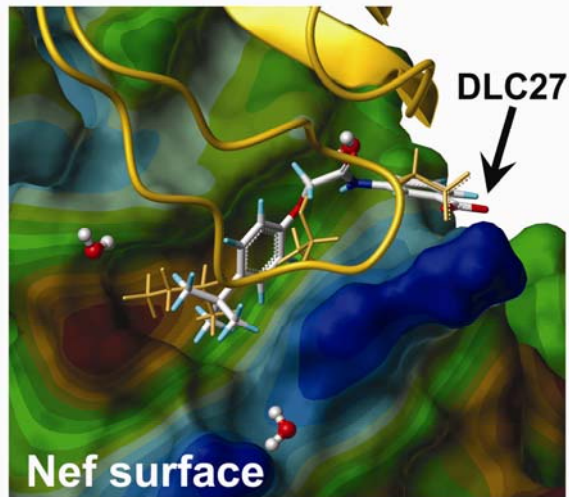

Supplement: pnas_0707130104_5.pdf [file pnas_0707130104_5.pdf]

**a)**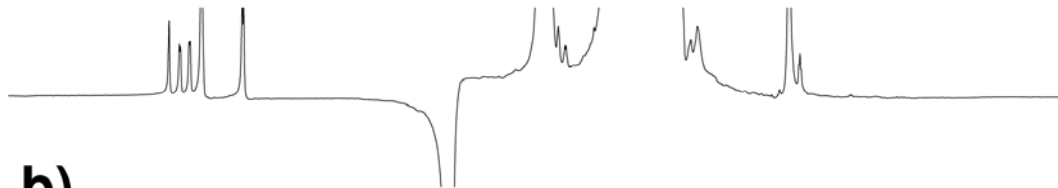**b)**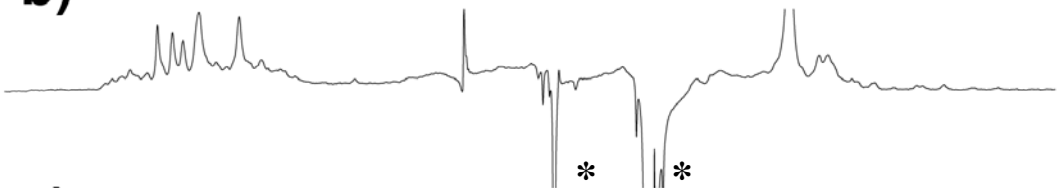**c)**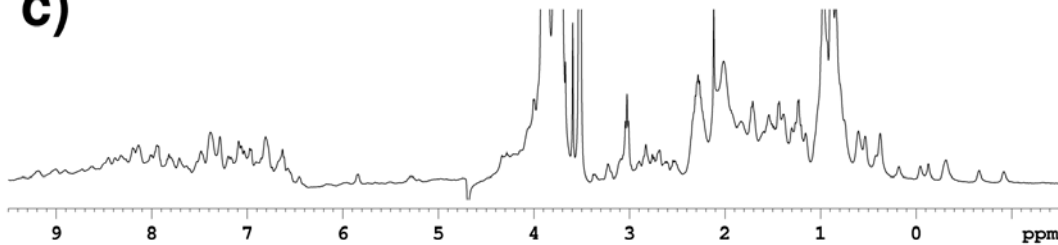

Supplement: pnas_0707130104_6.pdf [file pnas_0707130104_6.pdf]

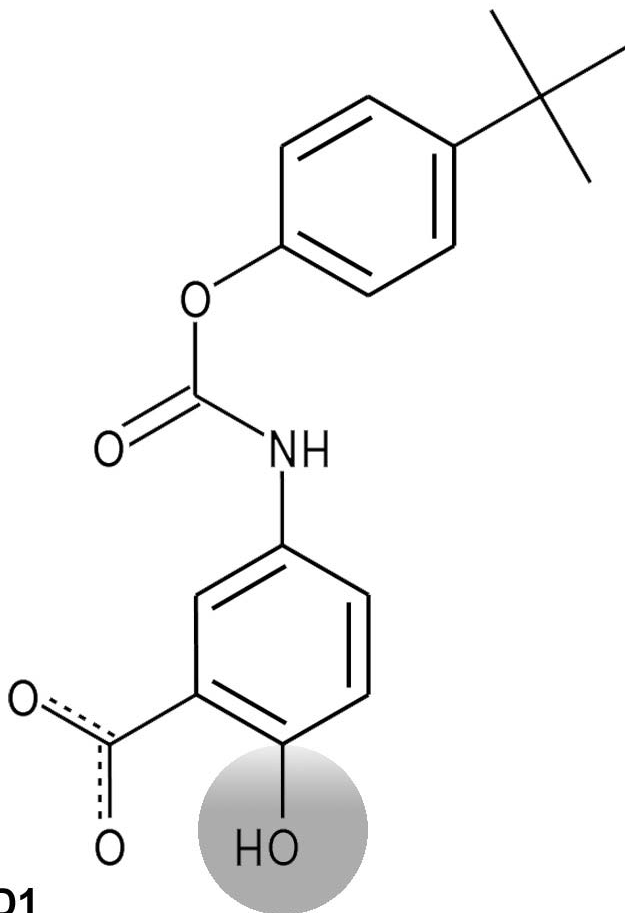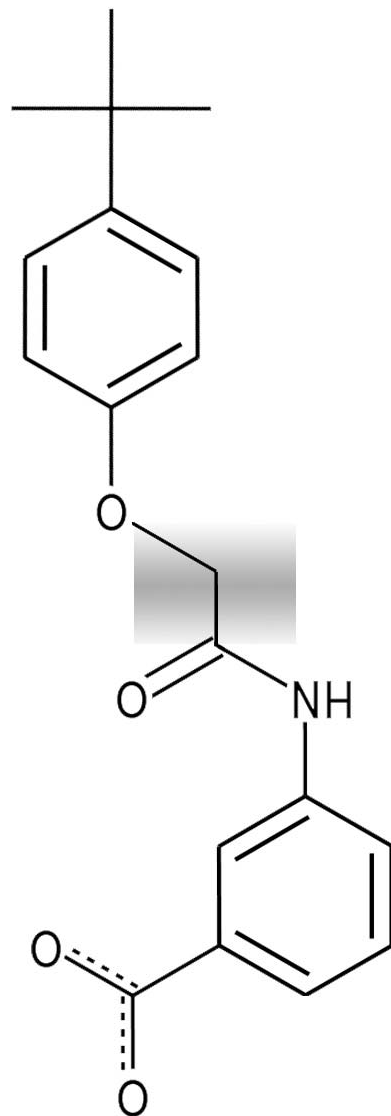

Supplement: pnas_0707130104_7.pdf [file pnas_0707130104_7.pdf]
